# Supplementary material
Source: PubMed Central journal article supplement (PMC7903344)
Supplement: mmc1.pdf [file mmc1.pdf]

## Supplemental Information

### **Transcriptomic profiling of SARS-CoV-2 infected human cell lines identifies HSP90 as target for COVID-19 therapy**

**Emanuel Wyler, Kirstin Mösbauer, Vedran Franke, Asija Diag, Lina Theresa Gottula, Roberto Arsiè, Filippos Klironomos, David Koppstein, Katja Hönzke, Salah Ayoub, Christopher Buccitelli, Karen Hoffmann, Anja Richter, Ivano Legnini, Andranik Ivanov, Tommaso Mari, Simone Del Giudice, Jan Papies, Samantha Praktijnjo, Thomas F. Meyer, Marcel Alexander Müller, Daniela Niemeyer, Andreas Hocke, Matthias Selbach, Altuna Akalin, Nikolaus Rajewsky, Christian Drosten, and Markus Landthaler**

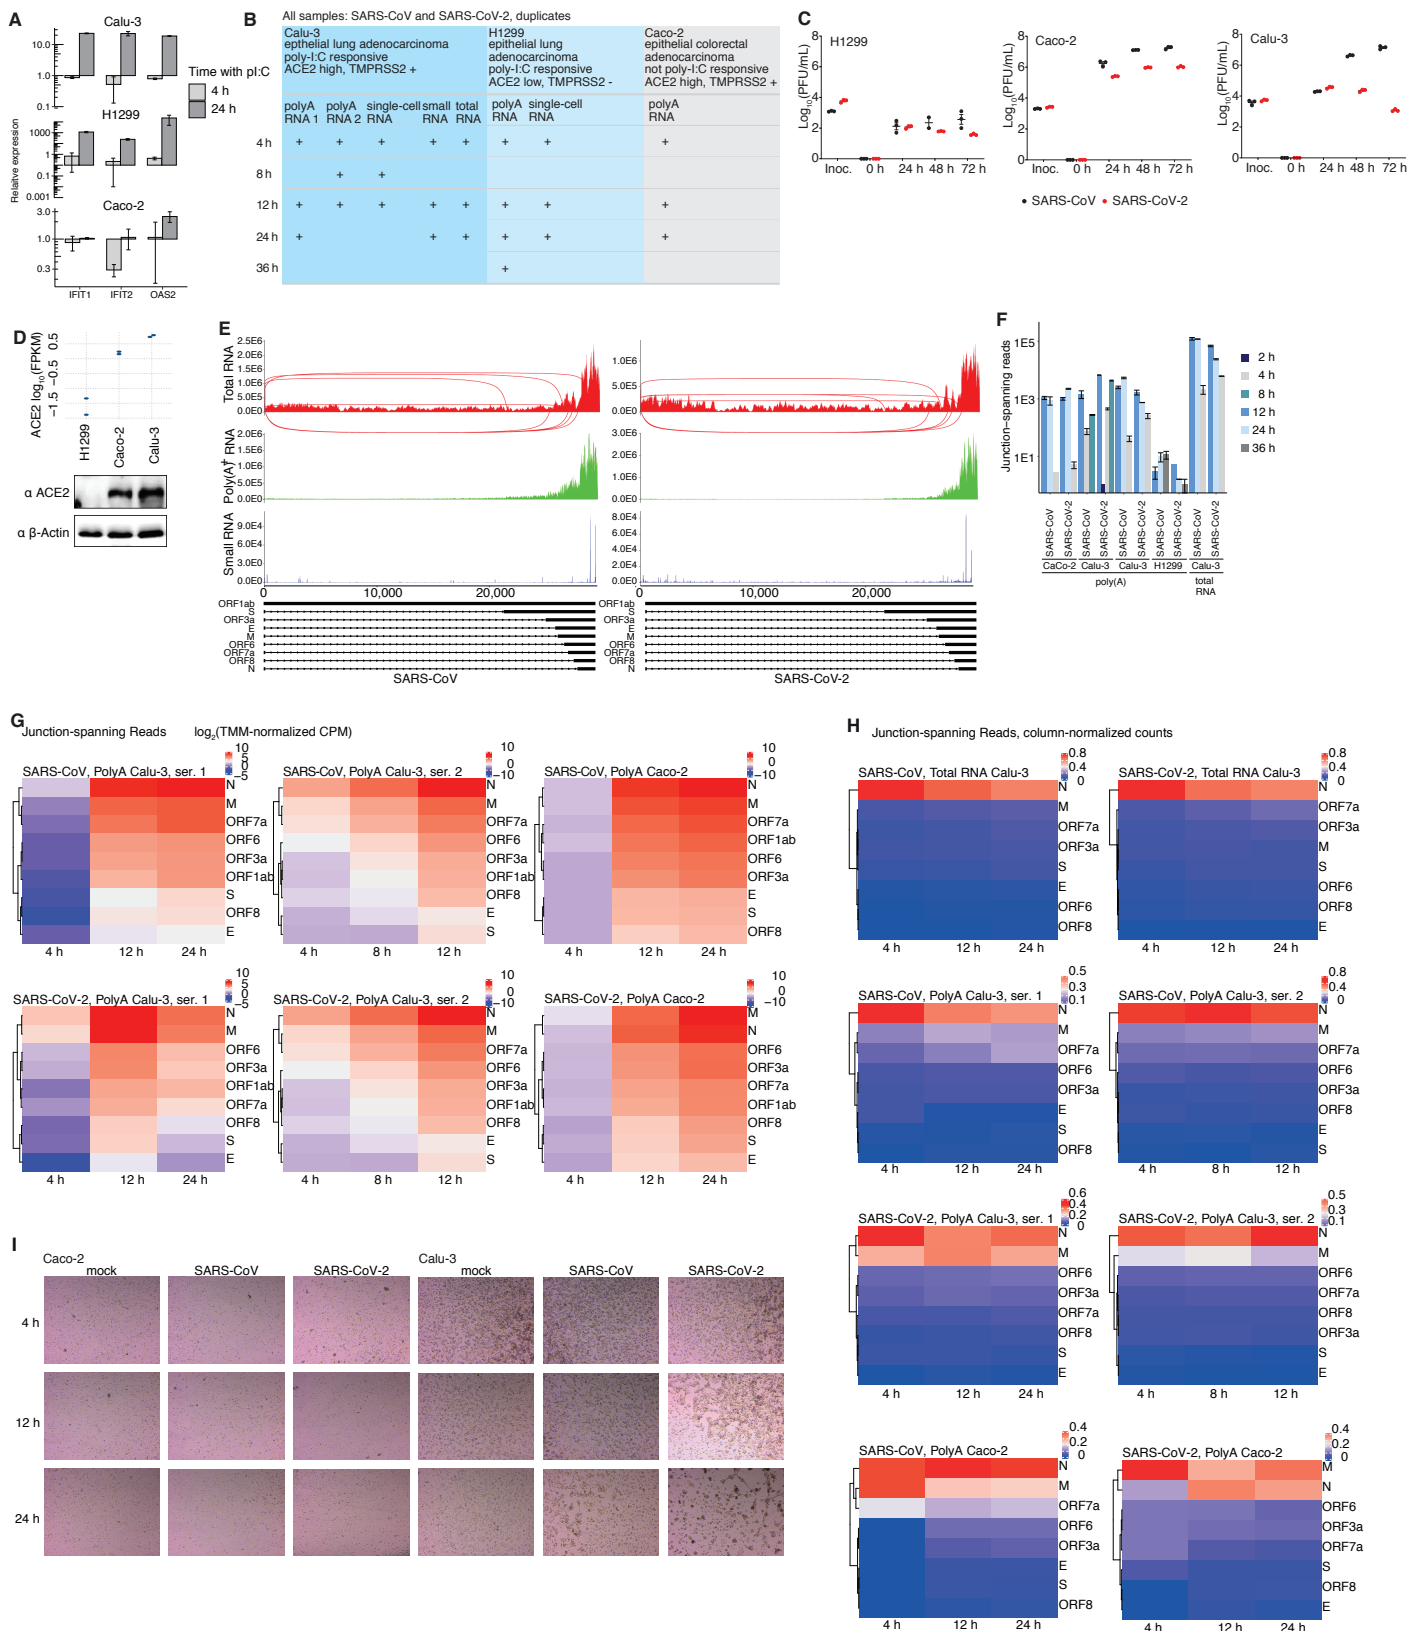

**Figure S1. Different permissiveness of SARS-CoV-2 infection in cell lines, Related to Figure 1**

A, Relative quantification (RQ) of responsiveness to dsRNA of the cell lines as tested by RT-qPCR of three ISGs upon transfection of poly-I:C.

B, Overview of experimental set up and collected datasets. Calu-3 cells turned out to be the most suitable cell line.

C, Growth kinetics of SARS-CoV and SARS-CoV-2 in the different cell lines (MOI 0.01). Log10 of plaque forming units (PFU) of the inoculum (inoc.) and different hours post infection are plotted.

D, Expression values of the ACE2 mRNA in the polyA RNA-seq mock samples (upper part) and protein expression assessed by Western blot analysis with specific antibodies of indicated cell lines (lower part). H1299 cells showed neither mRNA nor protein expression of ACE2.

E, Coverage across the viral genome merged across all datasets for total RNA-seq, poly(A)+ RNA-seq, and small RNA-seq data. The top eight junctions supported by split reads are plotted in "sashimi" style for the total RNA-seq.

F, Barplot of junction-spanning reads from poly(A) and total RNAseq at indicated time point of different cell lines and series.

G and H, Heatmaps of canonical junction-spanning reads, averaged across biological replicates per time point, expressed in TMM-normalized counts per million (G), or relative counts per time point (H). ORF1ab levels are estimated by counting contiguous reads mapping to the leader junction site.

I, Phase-contrast microscopy images of with either virus infected Caco-2 and Calu-3 cells at indicated time points. CaCo-2 cells appear hardly affected by the infection; whereas, Calu-3 clearly show signs of cell death at 24 hours post infection (hpi), particularly when infected with SARS-CoV-2.

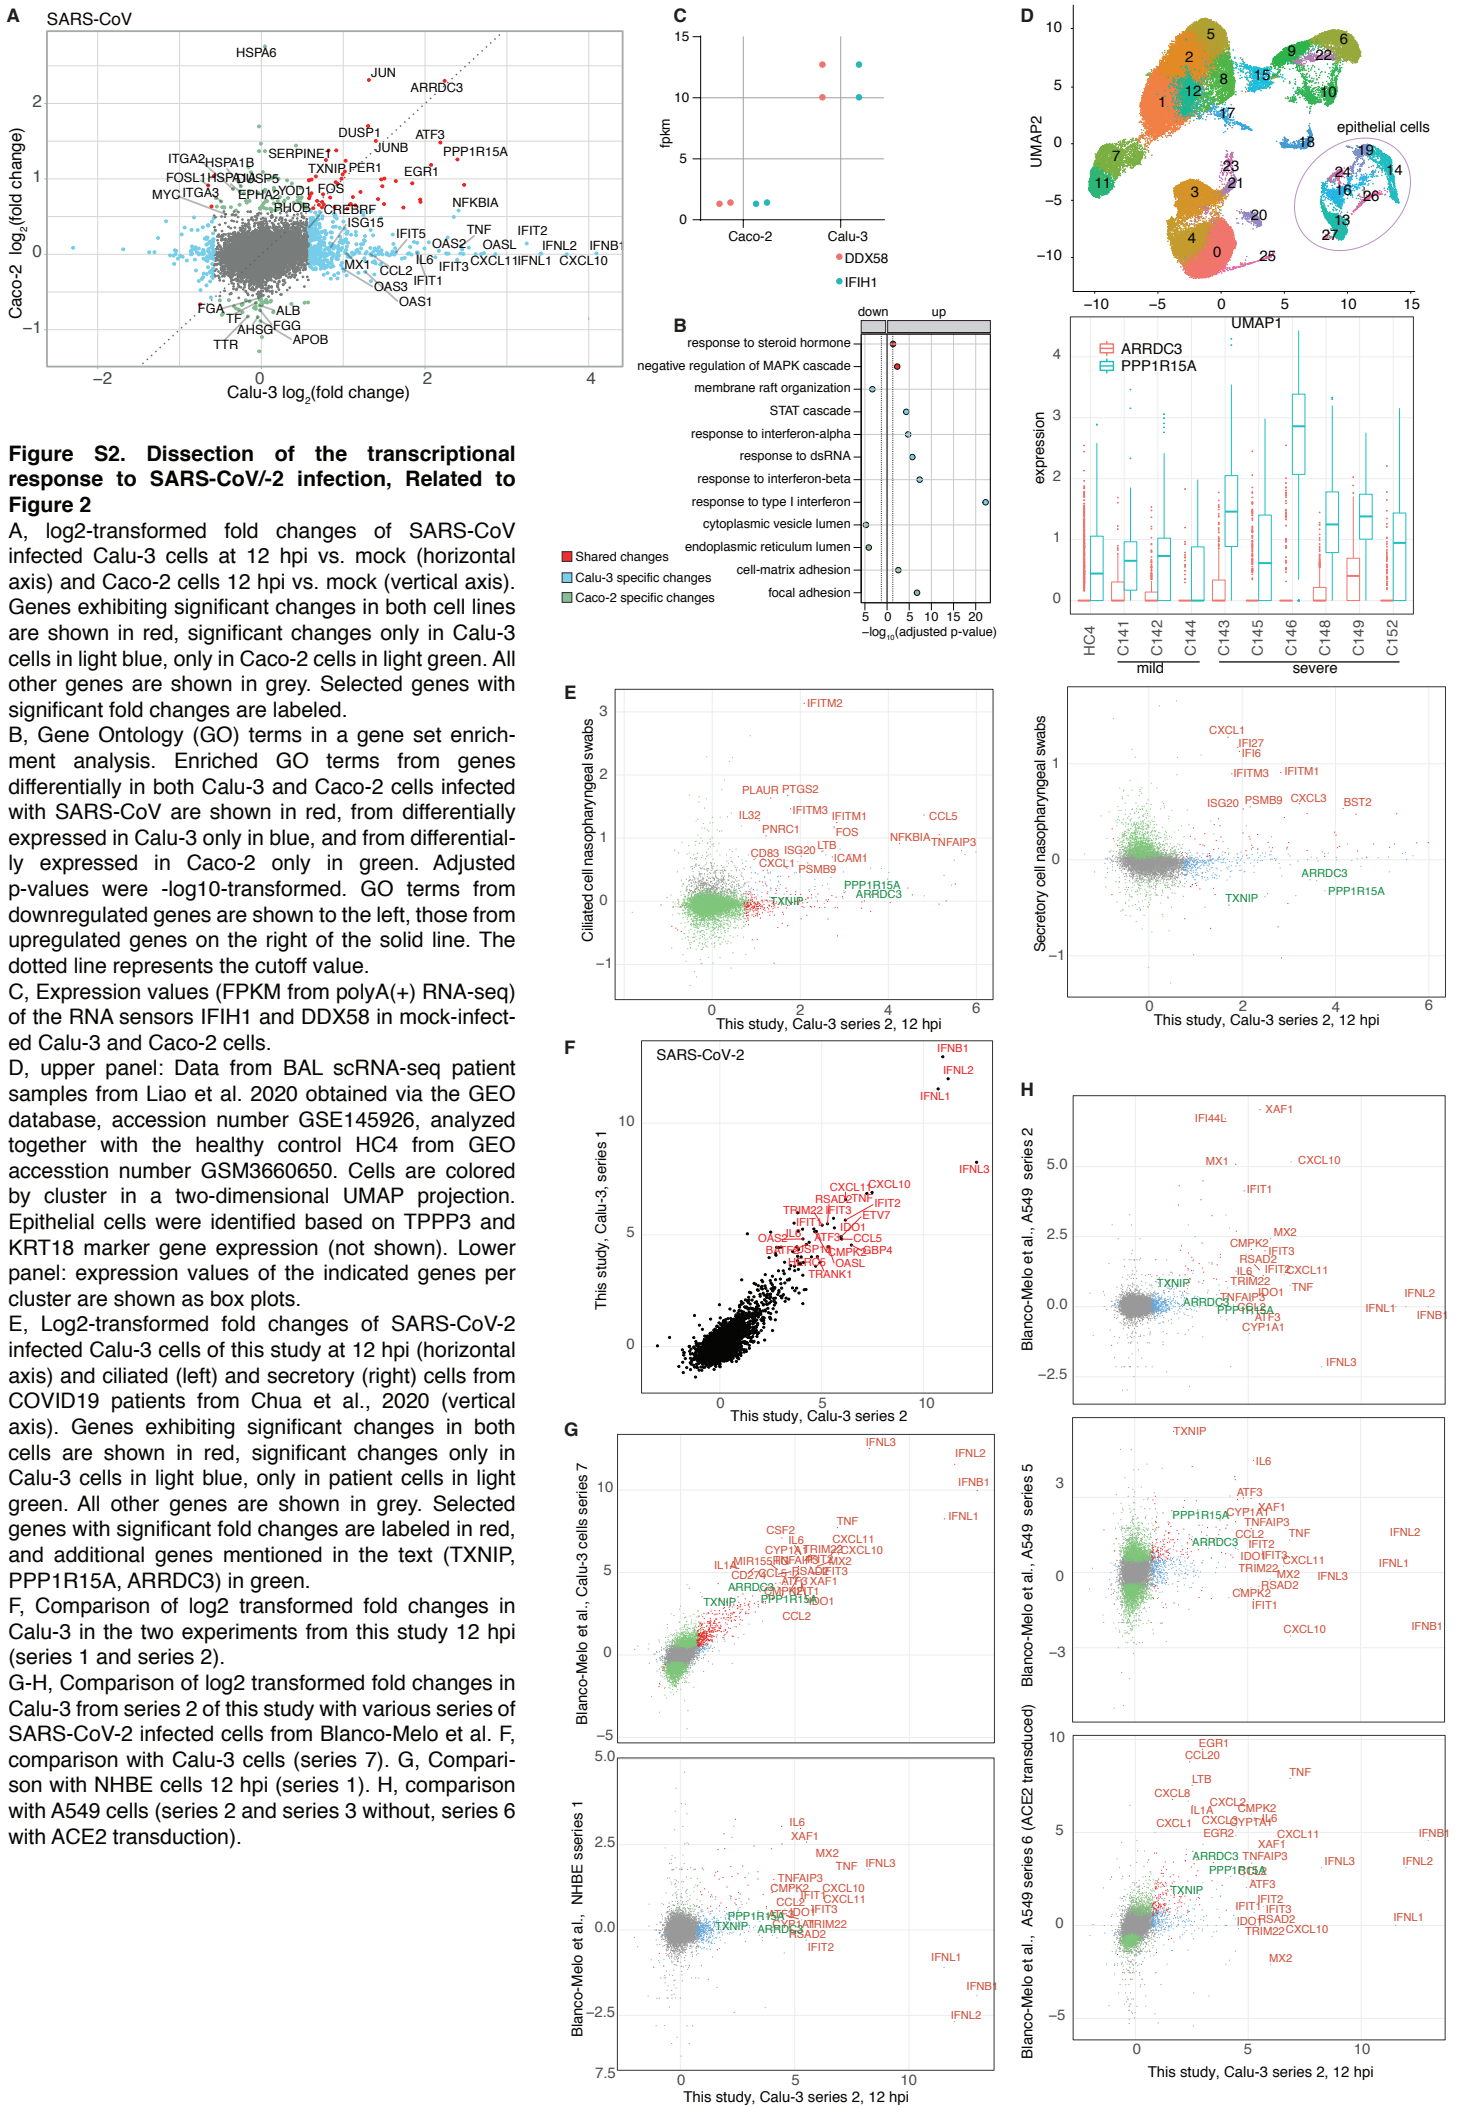

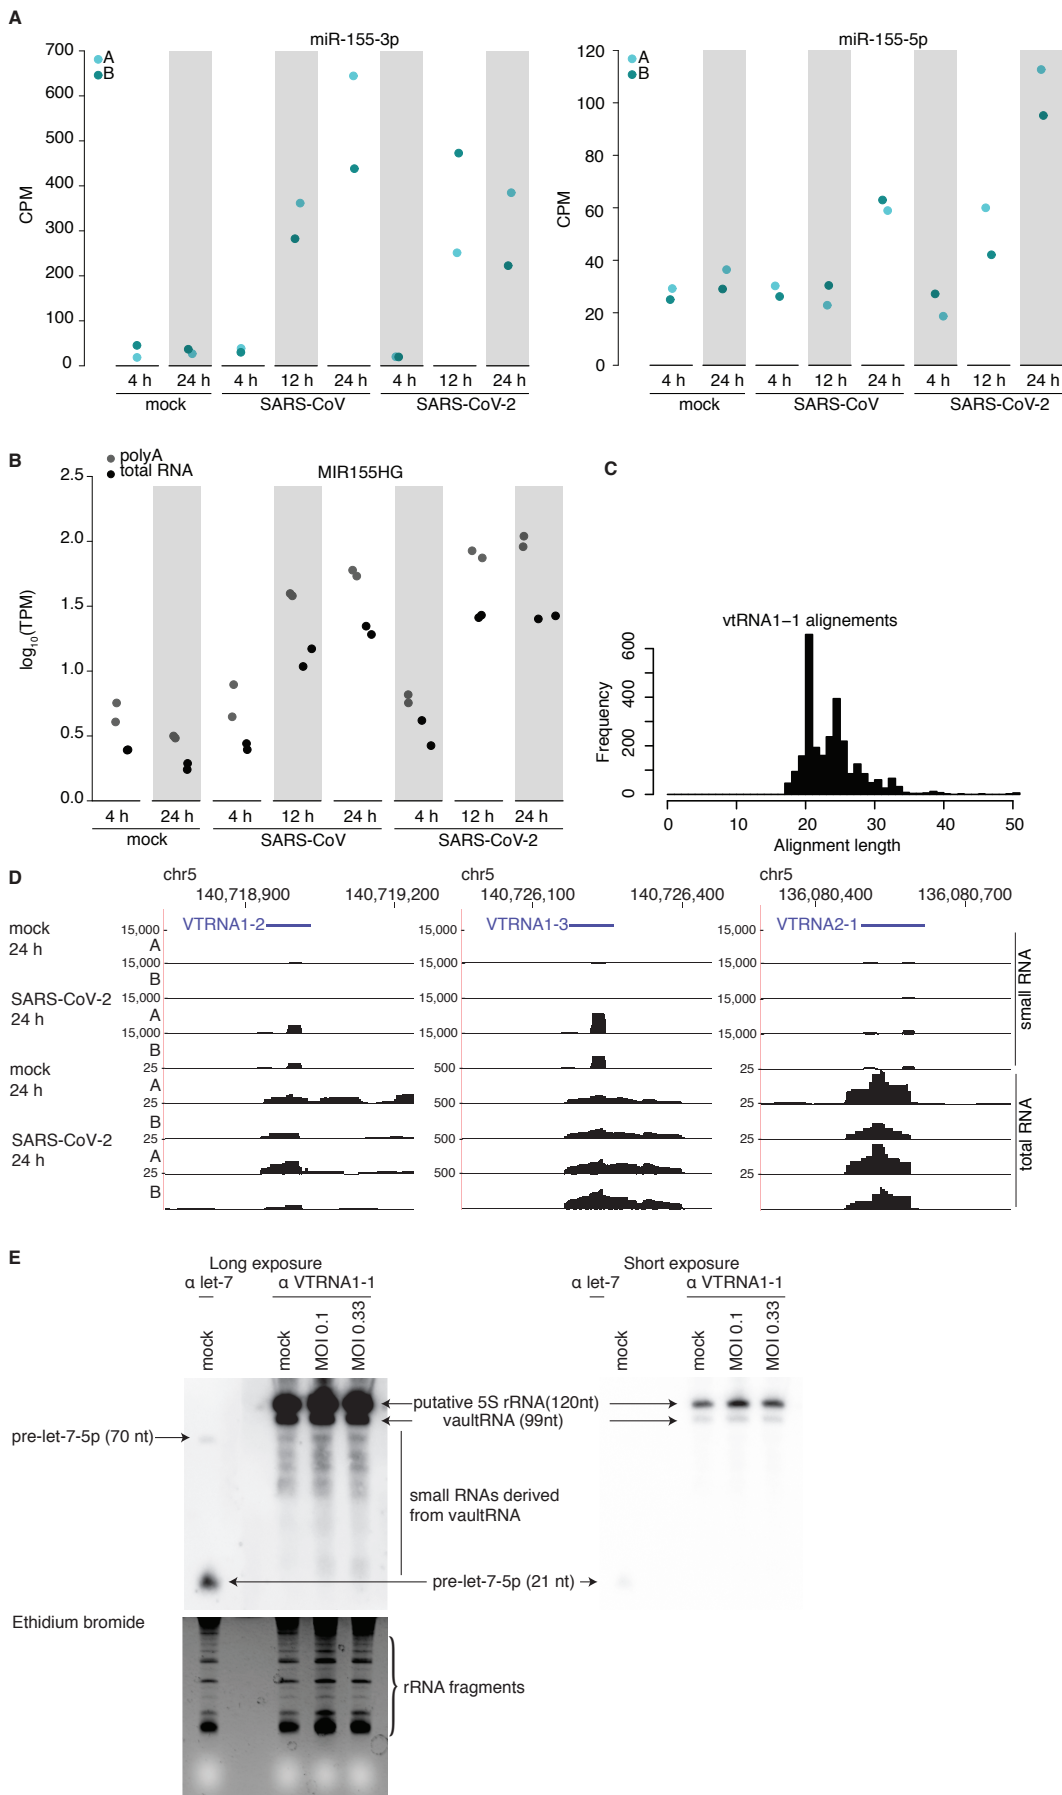

**Figure S3. MicroRNA miR-155 and vaultRNA-derived miRNAs are induced by the infection, Related to Figure 3**

**A**, Normalized counts (counts per million) of miR-155-3p (left panel) and miR-155-5p (right panel), colored by replicate.

**B**, Log10 miRNA-155 host gene transcripts per million in samples measured by polyA- or total RNAseq.

**C**, length distribution of small RNAs aligning to the VTRNA1-1 locus

**D**, coverage plots of the three vaultRNA genes VTRNA1-2, VTRNA1-3, and VTRNA2-1.

**E**, validation of small RNAs from the VTRNA1-1 locus using Northern blotting of SARS-CoV-2 infected Calu-3 cells 24 hpi. Input 5  $\mu$ g total RNA. Left panel: probing with probes recognizing let-7-5p (left lane) and vtRNAs (three lanes on the right). Predicted sizes are indicated. The strong band above the vtRNA likely represents 5S/5.8S rRNA. Right panel: same as left panel, but short exposure to visualize vtRNA1-1 levels. Bottom: Ethidium bromide staining as loading control with tRNA with predicted size indicated.

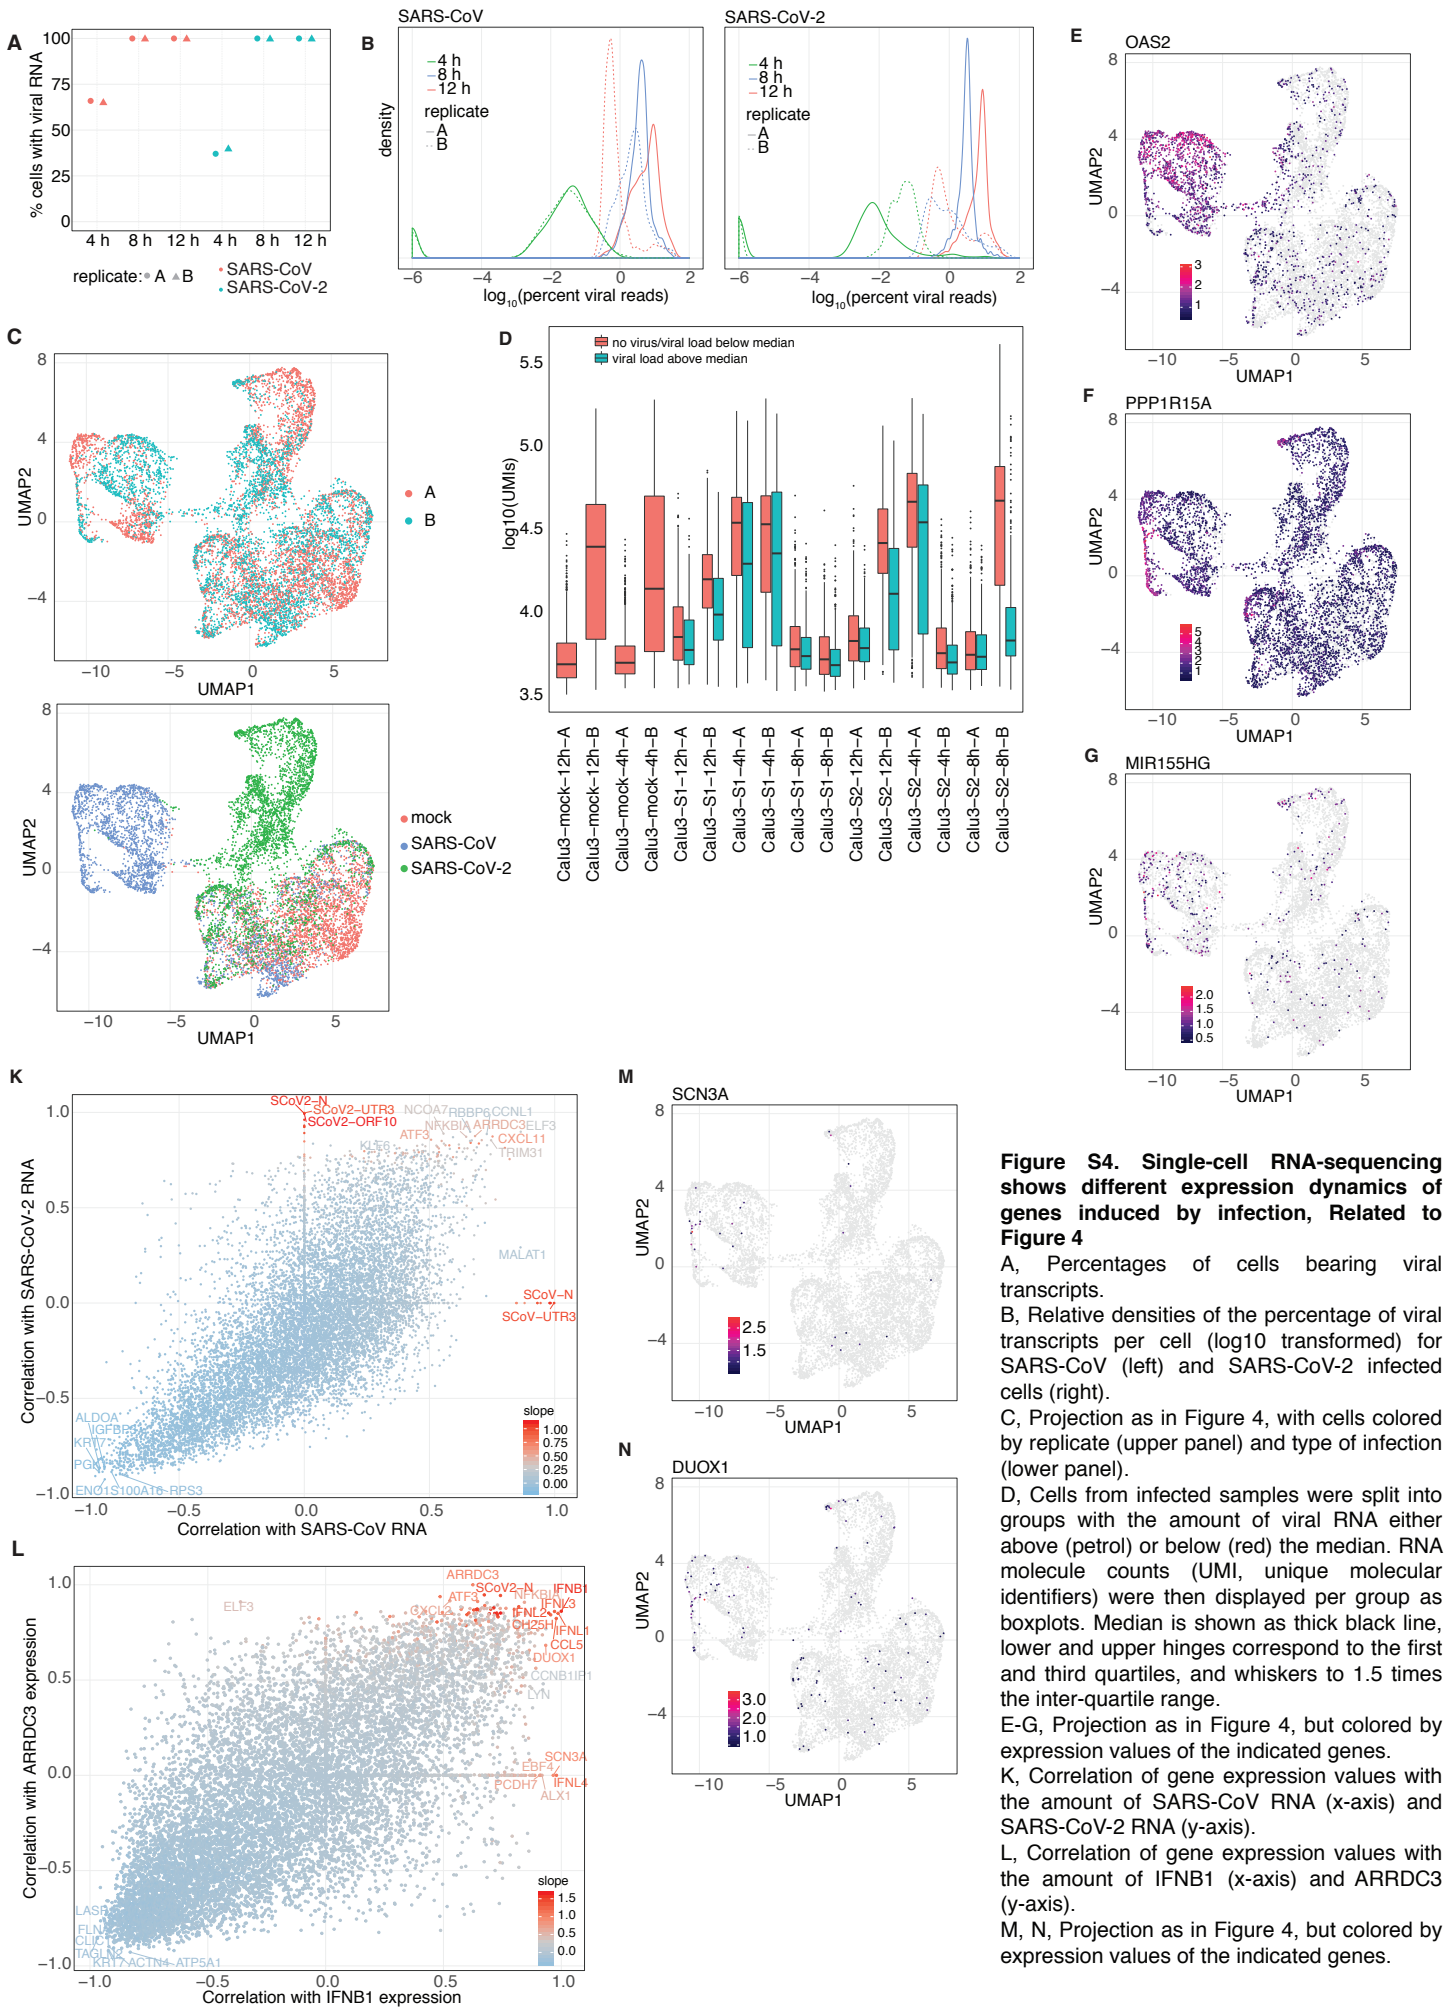

**Figure S4. Single-cell RNA-sequencing shows different expression dynamics of genes induced by infection, Related to Figure 4**

A, Percentages of cells bearing viral transcripts.

B, Relative densities of the percentage of viral transcripts per cell ( $\log_{10}$  transformed) for SARS-CoV (left) and SARS-CoV-2 infected cells (right).

C, Projection as in Figure 4, with cells colored by replicate (upper panel) and type of infection (lower panel).

D, Cells from infected samples were split into groups with the amount of viral RNA either above (petrol) or below (red) the median. RNA molecule counts (UMI, unique molecular identifiers) were then displayed per group as boxplots. Median is shown as thick black line, lower and upper hinges correspond to the first and third quartiles, and whiskers to 1.5 times the inter-quartile range.

E-G, Projection as in Figure 4, but colored by expression values of the indicated genes.

K, Correlation of gene expression values with the amount of SARS-CoV RNA (x-axis) and SARS-CoV-2 RNA (y-axis).

L, Correlation of gene expression values with the amount of IFNB1 (x-axis) and ARRDC3 (y-axis).

M, N, Projection as in Figure 4, but colored by expression values of the indicated genes.

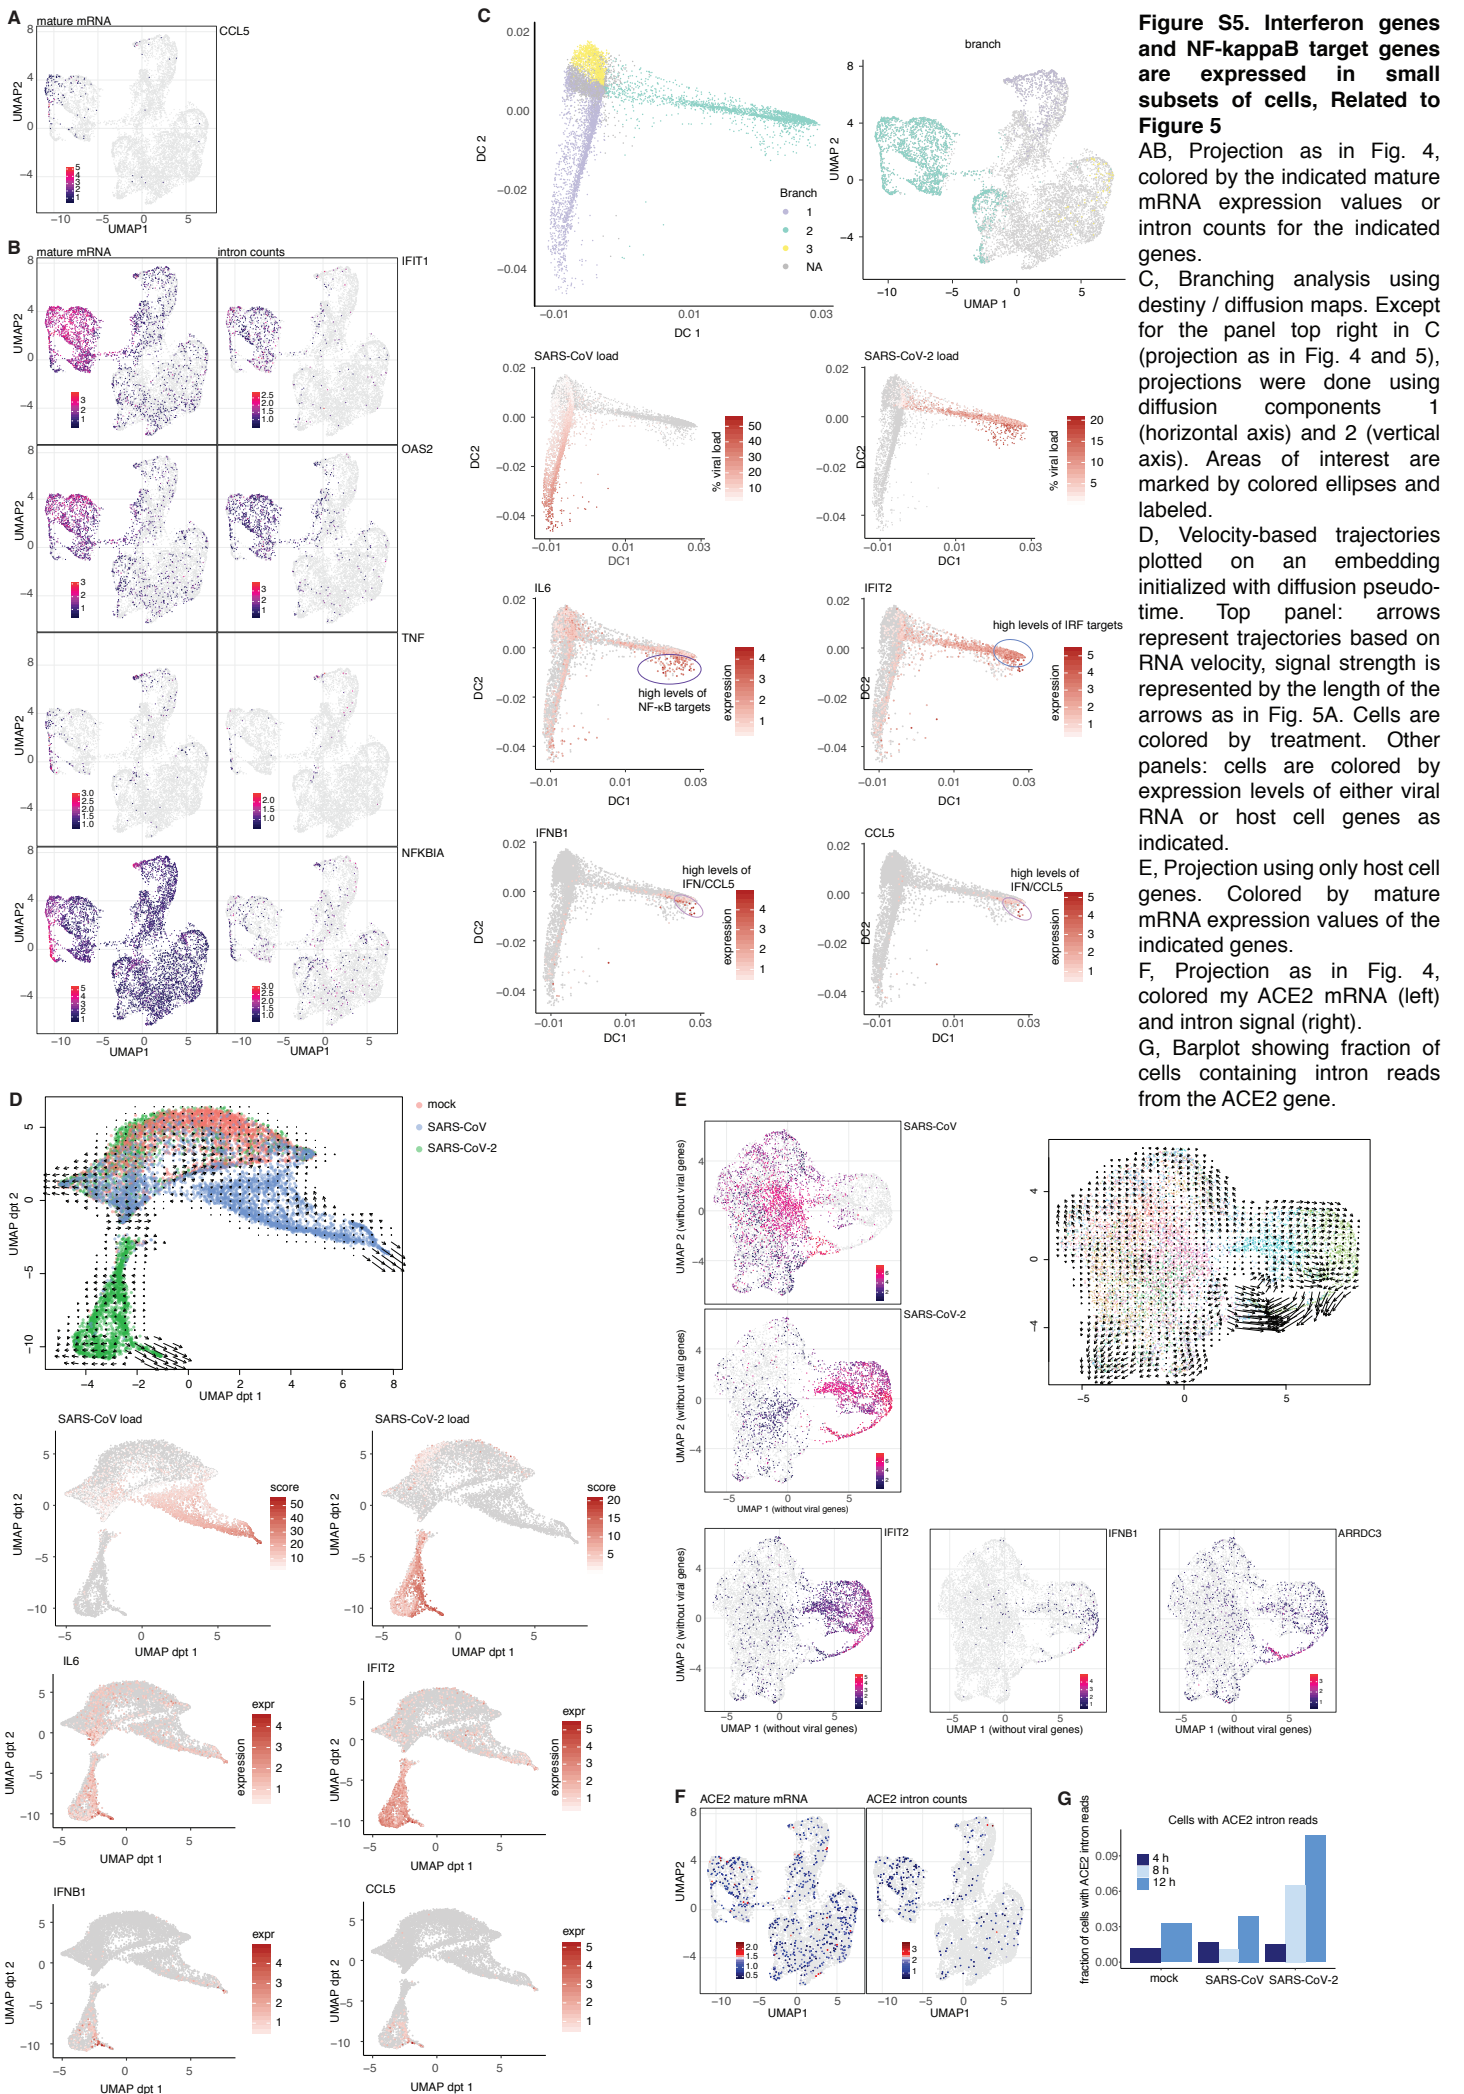

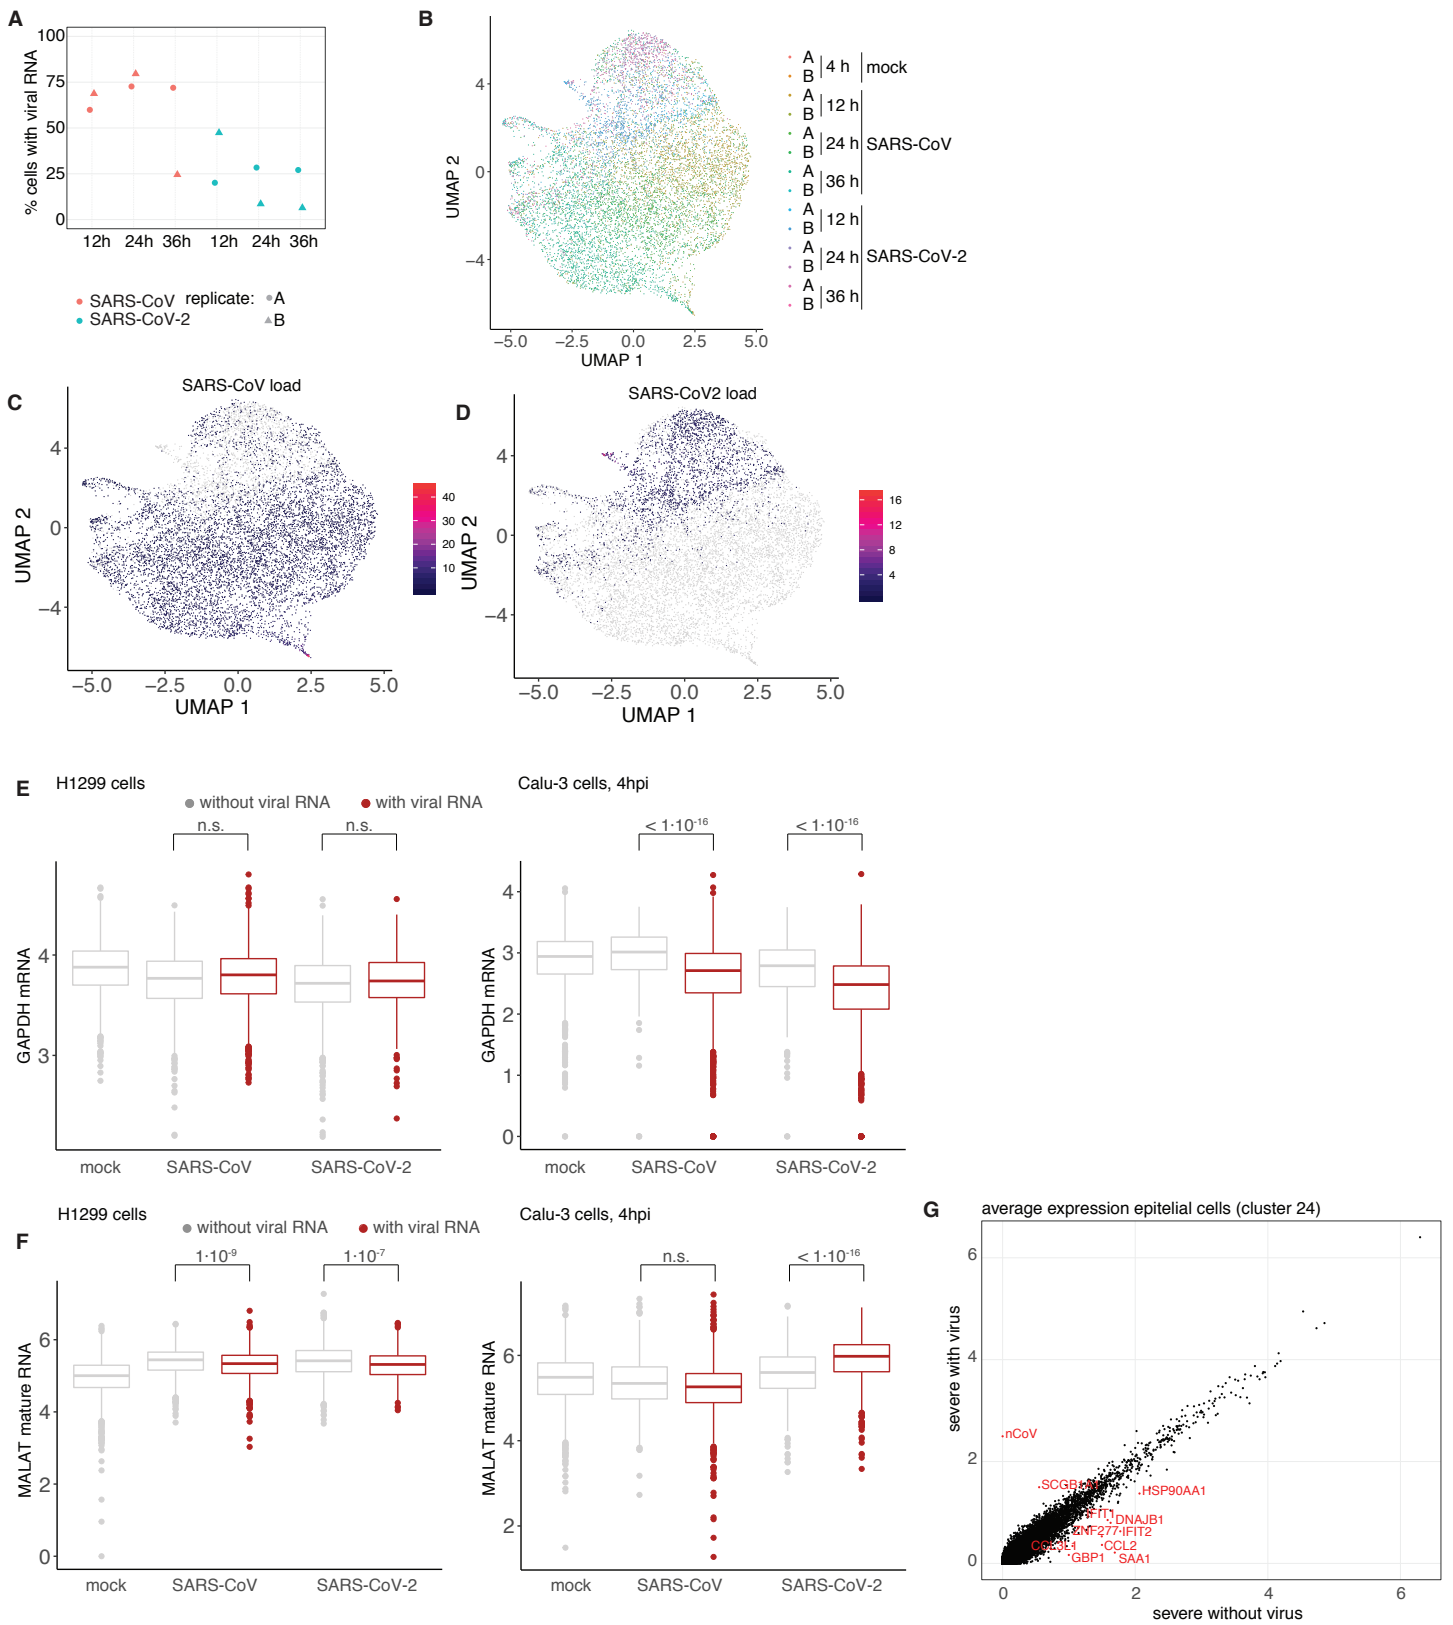

**Figure S6. HSP90AA1 is deregulated in SARS-CoV-2 infected cells, Related to Figure 6**

A, Percentages of cells with virus in the H1299 scRNA-seq data.

B-D, H1299 cells are projected in two dimensions using Uniform Manifold Approximation and Projection (UMAP) and colored as indicated.

E-F, as in Fig. 6B and D, but for GAPDH and MALAT1 transcripts.

G, average gene expression values in epithelial cells/cluster 24 (see Supplementary Figure 2) of cells with and without viral reads. Expression of viral reads is represented by "nCoV".

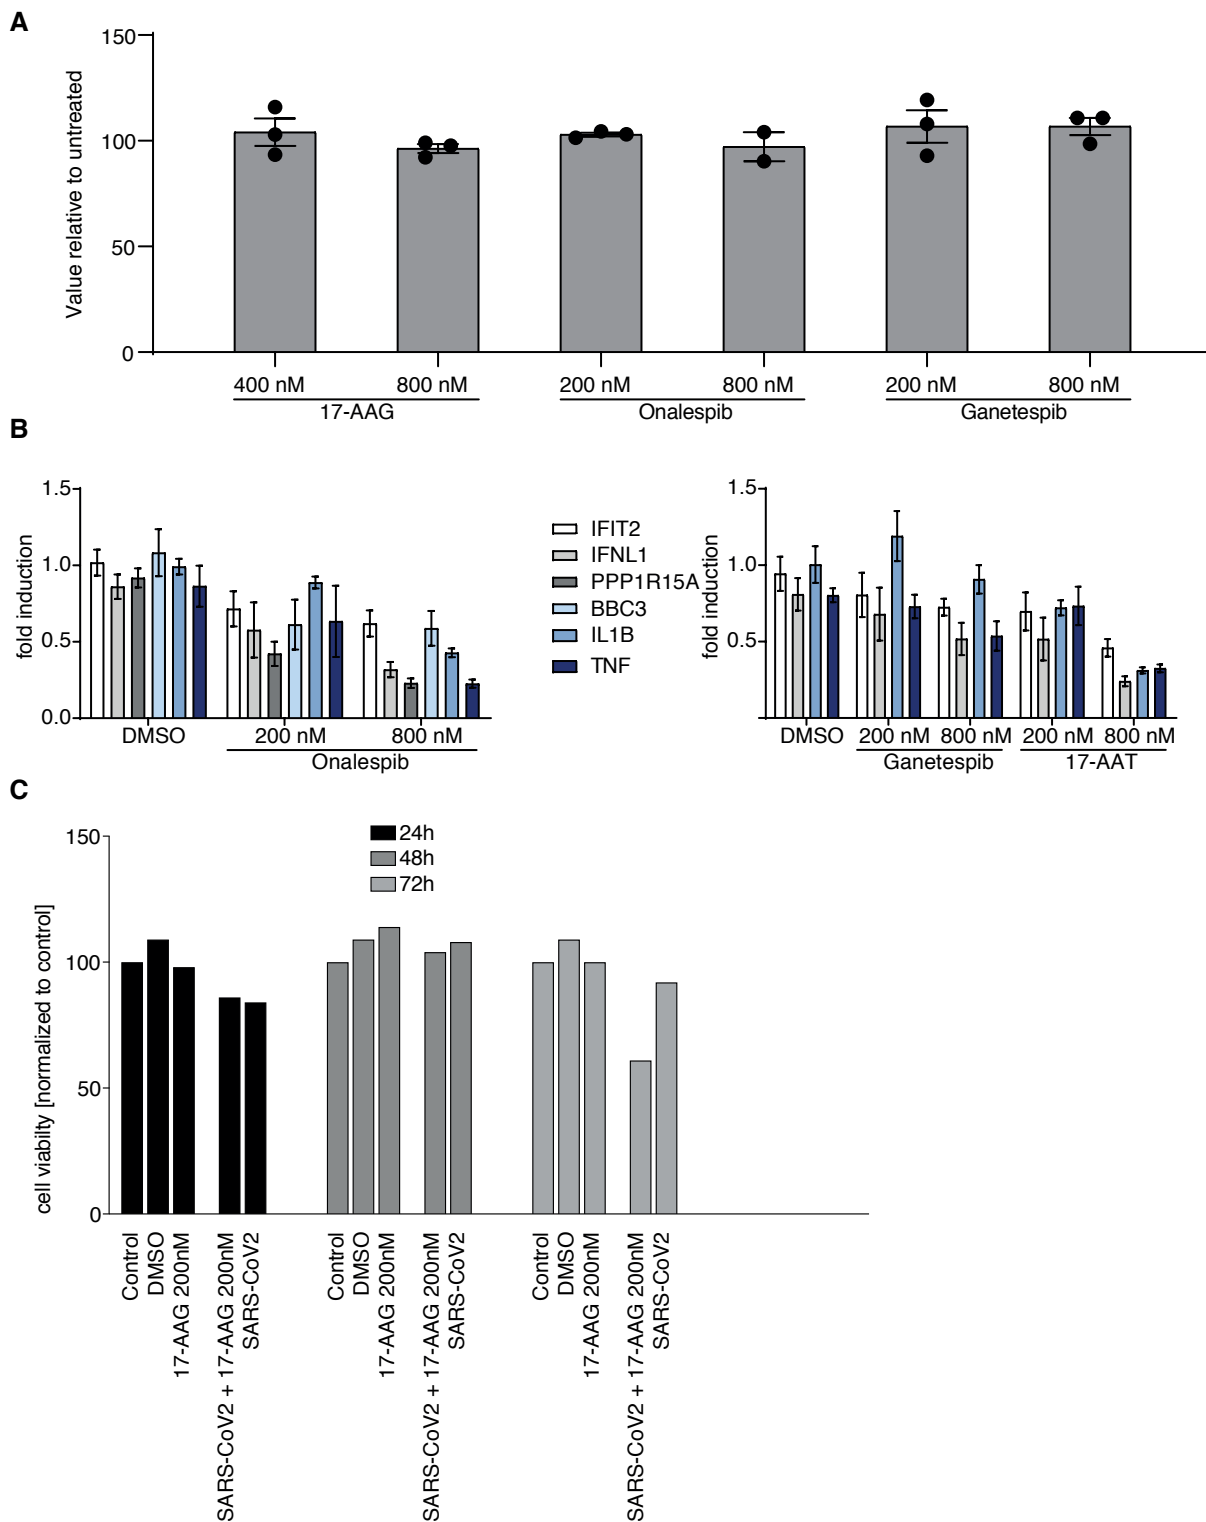

**Figure S7. HSP90 inhibitors treatment reduce SARS-CoV-2 replication and induction of pro-inflammatory cytokines, Related to Figure 7**

A, Cytotoxicity assay (CellTiter-Glo) of cells treated with the indicated HSP90 inhibitors for 16 hours.

B, Expression levels of selected mRNAs from the samples shown in Fig. 7 probed by RT-qPCR.

C, Cytotoxicity assay (CellTiter-Glo) of AECs treated with indicated treatments and time points.



**Table S1, Related to Figure 1**

**Overview of datasets**

Within file names, S1 means SARS-CoV-1 infection, S2 means SARS-CoV-2 infection, mock means mock infection (Vero cell supernatant), untr means untreated, i.e. no treatment at all

| polyA RNA-seq datasets                                                                                                                                             |                                         |                                                                                                                                                                                        |                                                                                                                                                                                                                  |
|--------------------------------------------------------------------------------------------------------------------------------------------------------------------|-----------------------------------------|----------------------------------------------------------------------------------------------------------------------------------------------------------------------------------------|------------------------------------------------------------------------------------------------------------------------------------------------------------------------------------------------------------------|
| <b>Caco-2 cells</b>                                                                                                                                                |                                         | <b>H1299 cells</b>                                                                                                                                                                     | <b>Calu-3 cells series 1</b>                                                                                                                                                                                     |
|                                                                                                                                                                    |                                         | <i>Note: these samples were harvested in parallel with the scRNA-seq and proteomics</i>                                                                                                | <i>Note: the same RNA was used to prepare the totalRNA and smallRNA data mentioned below. Cells that were detached after 24h were collected from the supernatant by centrifugation and processed separately.</i> |
| <b>time points</b>                                                                                                                                                 | <b>conditions</b>                       | <b>time points</b>                                                                                                                                                                     | <b>conditions</b>                                                                                                                                                                                                |
| 4h                                                                                                                                                                 | untreated, mock, SARS-CoV-1, SARS-CoV-2 | 4h                                                                                                                                                                                     | untreated, mock, SARS-CoV-1, SARS-CoV-2                                                                                                                                                                          |
| 12h                                                                                                                                                                | SARS-CoV-1, SARS-CoV-2                  | 12h                                                                                                                                                                                    | SARS-CoV-1, SARS-CoV-2                                                                                                                                                                                           |
| 24h                                                                                                                                                                | mock, SARS-CoV-1, SARS-CoV-2            | 24h                                                                                                                                                                                    | mock, SARS-CoV-1, SARS-CoV-2                                                                                                                                                                                     |
|                                                                                                                                                                    |                                         | 36h                                                                                                                                                                                    | mock, SARS-CoV-1, SARS-CoV-2                                                                                                                                                                                     |
|                                                                                                                                                                    |                                         |                                                                                                                                                                                        | <b>Calu-3 cells series 2</b>                                                                                                                                                                                     |
|                                                                                                                                                                    |                                         |                                                                                                                                                                                        | <i>Note: the same RNA was used to prepare the totalRNA and smallRNA data mentioned below. Cells that were detached after 24h were collected from the supernatant by centrifugation and processed separately.</i> |
|                                                                                                                                                                    |                                         |                                                                                                                                                                                        | <b>time points</b>                                                                                                                                                                                               |
|                                                                                                                                                                    |                                         |                                                                                                                                                                                        | <b>conditions</b>                                                                                                                                                                                                |
|                                                                                                                                                                    |                                         | 4h                                                                                                                                                                                     | mock, SARS-CoV-1, SARS-CoV-2                                                                                                                                                                                     |
|                                                                                                                                                                    |                                         | 8h                                                                                                                                                                                     | SARS-CoV-1, SARS-CoV-2                                                                                                                                                                                           |
|                                                                                                                                                                    |                                         | 12h                                                                                                                                                                                    | mock, SARS-CoV-1, SARS-CoV-2                                                                                                                                                                                     |
|                                                                                                                                                                    |                                         | 24h                                                                                                                                                                                    | detached cells from SARS-CoV-1 and SARS-CoV-2                                                                                                                                                                    |
| Total RNA-seq dataset (rRNA depletion)                                                                                                                             |                                         |                                                                                                                                                                                        |                                                                                                                                                                                                                  |
| <b>Calu-3</b>                                                                                                                                                      |                                         |                                                                                                                                                                                        |                                                                                                                                                                                                                  |
| <i>Note: the same RNA was used to prepare the polyA RNA series 1 and smallRNA data</i>                                                                             |                                         |                                                                                                                                                                                        |                                                                                                                                                                                                                  |
| <b>time points</b>                                                                                                                                                 | <b>conditions</b>                       |                                                                                                                                                                                        |                                                                                                                                                                                                                  |
| 4h                                                                                                                                                                 | untreated, mock, SARS-CoV-1, SARS-CoV-2 |                                                                                                                                                                                        |                                                                                                                                                                                                                  |
| 12h                                                                                                                                                                | SARS-CoV-1, SARS-CoV-2                  |                                                                                                                                                                                        |                                                                                                                                                                                                                  |
| 24h                                                                                                                                                                | mock, SARS-CoV-1, SARS-CoV-2            |                                                                                                                                                                                        |                                                                                                                                                                                                                  |
| SmallRNA-seq dataset                                                                                                                                               |                                         |                                                                                                                                                                                        |                                                                                                                                                                                                                  |
| <b>Calu-3</b>                                                                                                                                                      |                                         |                                                                                                                                                                                        |                                                                                                                                                                                                                  |
| <i>Note: the same RNA was used to prepare the polyA series 1 and smallRNA data</i>                                                                                 |                                         |                                                                                                                                                                                        |                                                                                                                                                                                                                  |
| <b>time points</b>                                                                                                                                                 | <b>conditions</b>                       |                                                                                                                                                                                        |                                                                                                                                                                                                                  |
| 4h                                                                                                                                                                 | untreated, mock, SARS-CoV-1, SARS-CoV-2 |                                                                                                                                                                                        |                                                                                                                                                                                                                  |
| 12h                                                                                                                                                                | SARS-CoV-1, SARS-CoV-2                  |                                                                                                                                                                                        |                                                                                                                                                                                                                  |
| 24h                                                                                                                                                                | mock, SARS-CoV-1, SARS-CoV-2            |                                                                                                                                                                                        |                                                                                                                                                                                                                  |
| Single-cell RNA-seq datasets                                                                                                                                       |                                         |                                                                                                                                                                                        |                                                                                                                                                                                                                  |
| <b>H1299 cells</b>                                                                                                                                                 |                                         | <b>Calu-3 cells</b>                                                                                                                                                                    |                                                                                                                                                                                                                  |
| <i>Note: these samples were harvested in parallel with the polyA RNA-seq and proteomics. Count table is provided for cells with more than 2000 detected genes.</i> |                                         | <i>Note: Count table is provided for cells with more than 1000 detected genes, however the analysis in the manuscript was done only with cells with more than 2000 detected genes.</i> |                                                                                                                                                                                                                  |
| <b>time points</b>                                                                                                                                                 | <b>conditions</b>                       | <b>time points</b>                                                                                                                                                                     | <b>conditions</b>                                                                                                                                                                                                |
| 4h                                                                                                                                                                 | mock                                    | 4h                                                                                                                                                                                     | mock, SARS-CoV-1, SARS-CoV-2                                                                                                                                                                                     |
| 12h                                                                                                                                                                | SARS-CoV-1, SARS-CoV-2                  | 8h                                                                                                                                                                                     | SARS-CoV-1, SARS-CoV-2                                                                                                                                                                                           |
| 24h                                                                                                                                                                | SARS-CoV-1, SARS-CoV-2                  | 12h                                                                                                                                                                                    | mock, SARS-CoV-1, SARS-CoV-2                                                                                                                                                                                     |
| 36h                                                                                                                                                                | mock, SARS-CoV-1, SARS-CoV-2            |                                                                                                                                                                                        |                                                                                                                                                                                                                  |
| Proteomics                                                                                                                                                         |                                         |                                                                                                                                                                                        |                                                                                                                                                                                                                  |
| <b>H1299 cells</b>                                                                                                                                                 |                                         |                                                                                                                                                                                        |                                                                                                                                                                                                                  |
| <i>Note: these samples were harvested in parallel with the scRNA-seq and polyA RNA-seq</i>                                                                         |                                         |                                                                                                                                                                                        |                                                                                                                                                                                                                  |
| <b>time points</b>                                                                                                                                                 | <b>conditions</b>                       |                                                                                                                                                                                        |                                                                                                                                                                                                                  |
| 4h                                                                                                                                                                 | mock                                    |                                                                                                                                                                                        |                                                                                                                                                                                                                  |
| 12h                                                                                                                                                                | SARS-CoV-1, SARS-CoV-2                  |                                                                                                                                                                                        |                                                                                                                                                                                                                  |
| 24h                                                                                                                                                                | SARS-CoV-1, SARS-CoV-2                  |                                                                                                                                                                                        |                                                                                                                                                                                                                  |
| 36h                                                                                                                                                                | mock, SARS-CoV-1, SARS-CoV-2            |                                                                                                                                                                                        |                                                                                                                                                                                                                  |

**Table S2, Related to Figure 1**

**Percentage of virals read in the data presented here and a previously published dataset (GEO identifier GSE147507, only human samples)**

| polyA RNA-seq datasets |         |                |         |                       |         |                       |         |
|------------------------|---------|----------------|---------|-----------------------|---------|-----------------------|---------|
| Caco-2 cells           |         | H1299 cells    |         | Calu-3 cells series 1 |         | Calu-3 cells series 2 |         |
|                        | % virus |                | % virus |                       | % virus |                       | % virus |
| SARSCoV1-12h-A         | 26.53%  | SARSCoV1-12h-A | 0.09%   | SARSCoV1-12h-A        | 35.79%  | 12h-SARSCoV1-1        | 5.00%   |
| SARSCoV1-12h-B         | 27.18%  | SARSCoV1-12h-B | 0.12%   | SARSCoV1-12h-B        | 38.17%  | 12h-SARSCoV1-2        | 5.40%   |
| SARSCoV1-24h-A         | 35.67%  | SARSCoV1-24h-A | 0.13%   | SARSCoV1-24h-A        | 48.13%  | 4h-SARSCoV1-1         | 0.33%   |
| SARSCoV1-24h-B         | 34.60%  | SARSCoV1-24h-B | 0.14%   | SARSCoV1-24h-A-sup    | 44.98%  | 4h-SARSCoV1-2         | 0.96%   |
| SARSCoV1-4h-A          | 0.16%   | SARSCoV1-36h-A | 0.13%   | SARSCoV1-24h-B        | 47.72%  | 8h-SARSCoV1-1         | 2.25%   |
| SARSCoV1-4h-B          | 0.18%   | SARSCoV1-36h-B | 0.15%   | SARSCoV1-24h-B-sup    | 51.72%  | 8h-SARSCoV1-2         | 3.10%   |
|                        |         | SARSCoV1-4h-A  | 0.02%   | SARSCoV1-4h-A         | 0.59%   |                       |         |
|                        |         | SARSCoV1-4h-B  | 0.02%   | SARSCoV1-4h-B         | 0.72%   |                       |         |
| SARSCoV2-12h-A         | 10.96%  | SARSCoV2-12h-A | 0.06%   | SARSCoV2-12h-A        | 32.89%  | 12h-SARSCoV2-1        | 35.77%  |
| SARSCoV2-12h-B         | 12.80%  | SARSCoV2-12h-B | 0.05%   | SARSCoV2-12h-B        | 32.97%  | 12h-SARSCoV2-2        | 39.63%  |
| SARSCoV2-24h-A         | 22.39%  | SARSCoV2-24h-A | 0.04%   | SARSCoV2-24h-A        | 16.48%  | 4h-SARSCoV2-1         | 1.58%   |
| SARSCoV2-24h-B         | 22.69%  | SARSCoV2-24h-B | 0.04%   | SARSCoV2-24h-A-sup    | 25.02%  | 4h-SARSCoV2-2         | 1.62%   |
| SARSCoV2-4h-A          | 0.08%   | SARSCoV2-36h-A | 0.04%   | SARSCoV2-24h-B        | 12.69%  | 8h-SARSCoV2-1         | 16.12%  |
| SARSCoV2-4h-B          | 0.10%   | SARSCoV2-36h-B | 0.04%   | SARSCoV2-24h-B-sup    | 16.18%  | 8h-SARSCoV2-2         | 15.16%  |
|                        |         | SARSCoV2-4h-A  | 0.01%   | SARSCoV2-4h-A         | 1.75%   |                       |         |
|                        |         | SARSCoV2-4h-B  | 0.01%   | SARSCoV2-4h-B         | 2.02%   |                       |         |

| Total RNA-seq dataset (rRNA depletion)                                                 |         |
|----------------------------------------------------------------------------------------|---------|
| Calu-3                                                                                 |         |
| <i>Note: the same RNA was used to prepare the polyA RNA series 1 and smallRNA data</i> |         |
|                                                                                        | % virus |
| SARSCoV1-12h-A                                                                         | 56.81%  |
| SARSCoV1-12h-B                                                                         | 58.68%  |
| SARSCoV1-24h-A                                                                         | 76.72%  |
| SARSCoV1-24h-B                                                                         | 77.10%  |
| SARSCoV1-4h-A                                                                          | 1.13%   |
| SARSCoV1-4h-B                                                                          | 1.95%   |
| SARSCoV2-12h-A                                                                         | 54.23%  |
| SARSCoV2-12h-B                                                                         | 54.30%  |
| SARSCoV2-24h-A                                                                         | 48.18%  |
| SARSCoV2-24h-B                                                                         | 42.87%  |
| SARSCoV2-4h-A                                                                          | 2.55%   |
| SARSCoV2-4h-B                                                                          | 3.01%   |

| GSE147507 samples          |          |
|----------------------------|----------|
| MOI of 0.2 for 24 h        |          |
| Sample                     | % virus  |
| Series15_COVID19Lung_1     | 0.00006% |
| Series15_COVID19Lung_2     | 0.002%   |
| Series1_NHBE_SARS-CoV-2_1  | 0.10%    |
| Series1_NHBE_SARS-CoV-2_2  | 0.08%    |
| Series1_NHBE_SARS-CoV-2_3  | 0.10%    |
| Series2_A549_SARS-CoV-2_1  | 0.03%    |
| Series2_A549_SARS-CoV-2_2  | 0.03%    |
| Series2_A549_SARS-CoV-2_3  | 0.03%    |
| Series5_A549_SARS-CoV-2_1  | 0.08%    |
| Series5_A549_SARS-CoV-2_2  | 0.08%    |
| Series5_A549_SARS-CoV-2_3  | 0.11%    |
| Series6_A549-ACE2_SARS-CoV | 53.60%   |
| Series6_A549-ACE2_SARS-CoV | 49.83%   |
| Series6_A549-ACE2_SARS-CoV | 57.49%   |
| Series7_Calu3_SARS-CoV-2_1 | 13.19%   |
| Series7_Calu3_SARS-CoV-2_2 | 17.01%   |
| Series7_Calu3_SARS-CoV-2_3 | 14.58%   |

**Table S3, Related to Figure 1**

(provided as Excel Table)

**Table S4, Related to Figure 4**

Statistics scRNA-seq

**H1299**

|                  |      |      |      | (more than 1 raw viral read count) |         |         |        |
|------------------|------|------|------|------------------------------------|---------|---------|--------|
|                  |      |      |      | no virus                           | with S1 | with S2 |        |
| H1299-mock-4h-A  | 696  | 695  | 1    | 0 H1299-mock-                      | 99,86%  | 0,14%   | 0,00%  |
| H1299-mock-4h-B  | 647  | 645  | 2    | 0 H1299-mock-                      | 99,69%  | 0,31%   | 0,00%  |
| H1299-mock-36h-A | 1924 | 1924 | 0    | 0 H1299-mock-                      | 100,00% | 0,00%   | 0,00%  |
| H1299-mock-36h-B | 1081 | 1081 | 0    | 0 H1299-mock-                      | 100,00% | 0,00%   | 0,00%  |
| H1299-S1-12h-A   | 2354 | 944  | 1410 | 0 H1299-S1-12                      | 40,10%  | 59,90%  | 0,00%  |
| H1299-S1-12h-B   | 1665 | 515  | 1150 | 0 H1299-S1-12                      | 30,93%  | 69,07%  | 0,00%  |
| H1299-S1-24h-A   | 1050 | 287  | 763  | 0 H1299-S1-24                      | 27,33%  | 72,67%  | 0,00%  |
| H1299-S1-24h-B   | 1787 | 359  | 1428 | 0 H1299-S1-24                      | 20,09%  | 79,91%  | 0,00%  |
| H1299-S1-36h-A   | 3005 | 843  | 2162 | 0 H1299-S1-36                      | 28,05%  | 71,95%  | 0,00%  |
| H1299-S1-36h-B   | 793  | 596  | 197  | 0 H1299-S1-36                      | 75,16%  | 24,84%  | 0,00%  |
| H1299-S2-12h-A   | 1985 | 1586 | 0    | 399 H1299-S2-12                    | 79,90%  | 0,00%   | 20,10% |
| H1299-S2-12h-B   | 1710 | 894  | 0    | 816 H1299-S2-12                    | 52,28%  | 0,00%   | 47,72% |
| H1299-S2-24h-A   | 1363 | 976  | 0    | 387 H1299-S2-24                    | 71,61%  | 0,00%   | 28,39% |
| H1299-S2-24h-B   | 1227 | 1118 | 0    | 109 H1299-S2-24                    | 91,12%  | 0,00%   | 8,88%  |
| H1299-S2-36h-A   | 2162 | 1577 | 0    | 585 H1299-S2-36                    | 72,94%  | 0,00%   | 27,06% |
| H1299-S2-36h-B   | 1305 | 1217 | 0    | 88 H1299-S2-36                     | 93,26%  | 0,00%   | 6,74%  |

**Calu-3**

|                  |      |      |      | (more than 3 raw viral read counts) |         |         |         |
|------------------|------|------|------|-------------------------------------|---------|---------|---------|
|                  |      |      |      | no virus                            | with S1 | with S2 |         |
| Calu3-mock-4h-A  | 1454 | 1451 | 3    | 0 Calu3-mock-                       | 99,79%  | 0,21%   | 0,00%   |
| Calu3-mock-4h-B  | 839  | 838  | 0    | 1 Calu3-mock-                       | 99,88%  | 0,00%   | 0,12%   |
| Calu3-mock-12h-A | 1074 | 1074 | 0    | 0 Calu3-mock-                       | 100,00% | 0,00%   | 0,00%   |
| Calu3-mock-12h-B | 732  | 728  | 0    | 4 Calu3-mock-                       | 99,45%  | 0,00%   | 0,55%   |
| Calu3-S1-4h-A    | 642  | 226  | 416  | 0 Calu3-S1-4h-                      | 35,20%  | 64,80%  | 0,00%   |
| Calu3-S1-4h-B    | 654  | 251  | 403  | 0 Calu3-S1-4h-                      | 38,38%  | 61,62%  | 0,00%   |
| Calu3-S1-8h-A    | 1428 | 0    | 1428 | 0 Calu3-S1-8h-                      | 0,00%   | 100,00% | 0,00%   |
| Calu3-S1-8h-B    | 970  | 0    | 970  | 0 Calu3-S1-8h-                      | 0,00%   | 100,00% | 0,00%   |
| Calu3-S1-12h-A   | 715  | 0    | 715  | 0 Calu3-S1-12h-                     | 0,00%   | 100,00% | 0,00%   |
| Calu3-S1-12h-B   | 807  | 0    | 807  | 0 Calu3-S1-12h-                     | 0,00%   | 100,00% | 0,00%   |
| Calu3-S2-4h-A    | 551  | 355  | 0    | 196 Calu3-S2-4h-                    | 64,43%  | 0,00%   | 35,57%  |
| Calu3-S2-4h-B    | 1170 | 736  | 0    | 434 Calu3-S2-4h-                    | 62,91%  | 0,00%   | 37,09%  |
| Calu3-S2-8h-A    | 948  | 0    | 0    | 948 Calu3-S2-8h-                    | 0,00%   | 0,00%   | 100,00% |
| Calu3-S2-8h-B    | 510  | 0    | 0    | 510 Calu3-S2-8h-                    | 0,00%   | 0,00%   | 100,00% |
| Calu3-S2-12h-A   | 767  | 0    | 0    | 767 Calu3-S2-12h-                   | 0,00%   | 0,00%   | 100,00% |
| Calu3-S2-12h-B   | 732  | 0    | 0    | 732 Calu3-S2-12h-                   | 0,00%   | 0,00%   | 100,00% |

## Transparent Methods

### *Cell culture*

Vero E6 (ATCC CRL-1586), Calu-3 (ATCC HTB-55), Caco-2 (ATCC HTB-37) and H1299 (ATCC CRL-5803) were cultivated in Dulbecco's modified Eagle's medium (DMEM) supplemented with 10% heat-inactivated fetal calf serum, 1% non-essential amino acids, 1% L-glutamine and 1% sodium pyruvate (all Thermo Fisher Scientific) in a 5% CO<sub>2</sub> atmosphere at 37 °C.

### *Poly-I:C transfections*

Transient transfection of eukaryotic cells was performed using X-tremeGENE™ siRNA transfection reagent (Roche) according to the manufacturer's instructions. Briefly, 2x10<sup>5</sup> cells/ml were grown in 6-well plates for 24 h and fresh DMEM without antibiotics was added. OptiPRO SFM™ (Gibco) was supplemented with 0.25 µg poly(I:C) (Invivogen) and 0.75 µl X-tremeGENE™ siRNA reagent, incubated for 15 min, and 100 µl transfection mix was added to the cells.

### *RT-qPCR on intracellular RNA*

RNA was isolated from Trizol using the RNA clean and concentrator kit (Zymo). The RNA was reverse transcribed using maxima RT and subjected to qPCR as described (Wyler et al., 2019). Primers used for qPCR are listed in supplementary table 5.

### *Viruses*

SARS-CoV (Frankfurt strain, NCBI accession number AY310120) and SARS-CoV-2 (Patient isolate, BetaCoV/Munich/BavPat1/2020|EPI\_ISL\_406862) were used. For virus stock production, virus was grown on Vero E6 cells and concentrated using Vivaspin® 20 concentrators (Sartorius Stedim Biotech). Virus stocks were stored at -80°C, diluted in OptiPro serum-free medium supplemented with 0.5% gelatine (Sigma Aldrich) and phosphate-buffered saline (PBS, Thermo Fisher Scientific). Titer was defined by plaque titration assay. Cells inoculated with cell culture supernatants from uninfected Vero cells mixed with OptiPro serum-free medium supplemented with 0.5% gelatine and PBS, in accordance to virus stock preparation, serves as mock infected controls. All infection experiments were carried out under biosafety level three conditions with enhanced respiratory personal protection equipment.

### *Virus growth kinetics and plaque titration assay*

24 h prior to infection, the different cell lines were seeded to 70% confluence. The cells were washed once with PBS before virus (diluted in OptiPro serum-free medium) adsorption. After

incubation for 1 h at 37 °C, 5% CO<sub>2</sub> the virus-containing supernatant was discarded and cells were washed twice with PBS and supplied with DMEM as described above.

To determine the amount of infectious virus particles in the supernatant a plaque titration assay was performed. For the assay Vero E6 cells were seeded to confluence and infected with serial dilution of virus-containing cell culture supernatant diluted in OptiPro serum-free medium. One hour after adsorption, supernatants were removed and cells overlaid with 2.4% Avicel (FMC BioPolymers) mixed 1:1 in 2xDMEM. Three days post-infection the overlay was removed, and cells were fixed in 6% formaldehyde and stained with a 0.2% crystal violet, 2% ethanol and 10% formaldehyde.

#### *Western Blot Analysis*

The expression of human ACE-2 (hACE-2) was confirmed by Western blot analysis. For the preparation of total cell lysate cells were washed with PBS and lysed in RIPA Lysis Buffer (Thermo Fisher Scientific) supplied with 1% Protease Inhibitor Cocktail Set III (Merck Chemicals). After an incubation of 30 min at 4 °C, cell debris were pelleted (10 min, 13,000 x g, 4 °C) and the supernatant transferred to a fresh reaction tube. For determining protein concentration Thermo Scientific's Pierce™ BCA Protein Assay Kit, according to the manufacturer's instructions was used. The protein lysates were mixed with 4xNuPAGE LDS Sample Buffer (Invitrogen) supplemented with 10% 2-mercaptoethanol (Roth). Protein lysates were separated by size on a 12% sodium dodecyl sulfatepolyacrylamid (SDS) gel and blotted onto a 0.2 µm polyvinylidene difluoride (PVDF) membrane (Thermo Scientific) by semi-dry blotting (BioRad). Primary detection of hACE-2 was done using a goat anti-hACE-2 antibody (1:1,250; #AF933, R&D Systems), a horseradish peroxidase (HRP)-labeled donkey anti-goat antibody (1:5,000, Dianova) and Super Signal West Femto Chemiluminescence Substrate (Thermo Fisher Scientific). As loading control, samples were analyzed for β-actin expression using a mouse anti-β-actin antibody (1:5,000, Sigma Aldrich) and a HRP-labeled goat anti-mouse antibody (1:10,000, Sigma-Aldrich).

#### *Infections for RNA sequencing experiments*

Calu-3 cells and H1299 cells were seeded at a concentration of 6 x 10<sup>5</sup> cells/mL and 5 x 10<sup>4</sup> cells/mL, respectively. 24 h post seeding cells were infected with SARS-CoV and SARS-CoV-2 at an MOI of 0.33 or Vero cell supernatant mixed with OptiPro serum-free medium supplemented with 0.5 % gelatine and PBS as negative control. 4, 8, 12 and 24 hpi samples were taken. For sequencing of total RNA the supernatant was removed and Trizol LS Reagent (Thermo Fisher Scientific) was applied to the cell-layer and incubated for 1 min at room temperature until the cells were lysed. The suspension was then transferred to a RNase

free reaction tube (Thermo Fisher Scientific) and stored at -80 °C. For scRNA-seq sample preparation the cells were washed with pre-warmed PBS, detached with pre-warmed trypsin for 3 min at 37 °C. The detached cells were transferred into a reaction tube (Eppendorf) and the following steps were performed on ice. Cells were spun down at 1000 x g for 2 min at 4 °C, resuspended in PBS properly and passed through a 35 µm blue snap cap cell strainer (STEMCELL) and again pelletized. The cell pellet was then resuspended in pre-chilled methanol (Roth) and stored at -80 °C.

#### *RNA sequencing*

##### *Poly-A RNA sequencing*

Poly-A RNA sequencing libraries were prepared using the NEBNext Ultra II Directional RNA Library Prep Kit (NEB) according to the manufacturer's protocols. Libraries were sequenced on a NextSeq 500 device at 1x76 cycles.

##### *Small RNA sequencing*

100 ng of total RNA of each condition was used for small RNA library preparation. Library preparation was performed using the SMARTer smRNA-Seq kit for Illumina from Clontech according to manufacturer's instruction. The small RNA libraries were pooled together with 19 % PhiX and sequenced on the NextSeq 500, 1 x 50 cycles.

##### *Total RNA sequencing*

1 µg of total RNA of each condition was used for total RNA library preparation. First, samples were depleted of ribosomal RNA using the RiboCop rRNA Depletion Kit (Lexogen) according to manufacturer's instruction. Following, ribo-depleted samples were processed with the TruSeq mRNA stranded kit from Illumina according to manufacturer's instruction. The total RNA libraries were sequenced on the HiSeq 4000, 2 x 76 cycles.

##### *Viral RNA-seq analysis*

Total and poly(A)<sup>+</sup> RNA-seq reads were mapped with STAR 2.7.3a to a combined genome comprised of GRCh38 and GenBank MN908947 (SARS-CoV-2) or AY310120 (SARS-CoV) using permissive parameters for noncanonical splicing<sup>36, 101</sup>. Viral genes were quantified by taking the top eight noncanonical splice events called by STAR across all total RNA-seq datasets according to the numbers of uniquely-mapping reads spanning the junction (Supplemental Table 3; note that for host cell gene expression analysis, also non-uniquely mapped reads were used). To estimate levels of ORF1ab, insertions, soft-clipping events and split reads were filtered from virus-mapping reads, followed by intersection with positions 53-83 of the virus using bedtools, requiring a minimum of 24 nucleotides overlap to reflect the parameters STAR requires to call a noncanonical splice junction<sup>102</sup>. These counts were either

combined with a count matrix of the human genes quantified by STAR and TMM/CPM normalized with edgeR (Figure S1D) or normalized by the total number of viral junction-spanning reads per time point (Figure S1E) <sup>103</sup>. Coverage plots were made from merged STAR-mapped BAM files, or from Bowtie-mapped small RNA-seq BAM files using ggsashimi <sup>104</sup>. This workflow was implemented with custom Python scripts in a Snakemake pipeline <sup>105</sup>.

#### *microRNA analysis*

Raw reads were preprocessed by trimming with cutadapt (version 2.9) in two passes, first trimming i) the Illumina TruSeq adaptor at the 3' end and allowing for one mismatch, ii) all 3' end bases with mean Phred score below 30 and iii) the three 5' end overhang nucleotides associated with the template-switching Clontech library preparation protocol.

In the second pass, poly(A)-tails were trimmed. Trimmed reads were mapped using bowtie (version 1.2.2) to a SARS genome consisting of the combined SARS-CoV and SARS-CoV-2 genomes using the non-standard parameters (-q -n 1 -e 80 -l 18 -a -m 5 -best -strata). Reads that did not align to the SARS-CoV genome were aligned to the GRCh38 genome. The expression of known miRNAs (miRBase 22 annotation) was estimated using mirdeep2 (version 2.0.0.7) and standard parameters.

The differential expression analysis used the limma <sup>106</sup> and edgeR <sup>103</sup> packages after applying the voom transformation to the TMM-normalized count data produced by mirdeep2.

For the different viral infections we contrasted SARS-CoV-2 24 h / SARS-CoV-2 4 h with mock 24 h / mock-4 h in order to test for those miRNAs differentially expressed long after the infection having removed any effects seen in mock as well.

#### *TaqMan assays*

TaqMan probes were purchased from ThermoFisher. 10 ng to 50 ng of total RNA were used for TaqMan assays and assays were performed according manufacturer's instruction with minor modifications. The minor modifications were: 10 mM dNTPs, Superscript III, 5 x FS buffer and Ribolock were used for the reverse transcription (RT) reaction and for 50 ng RNA input only 2 µl of the RT primer was used. All biological samples were handled in triplicates and the Ct values were normalized to the let-7a control.

#### *Northern Blot*

2,5 µg to 5 µg of total RNA were mixed equally with 2 x RNA loading dye, following denaturation for 5 min at 95 °C. The RNA of the denaturated samples was separated on 15 % urea polyacrylamide gels, transferred onto Hybond-N+ nylon membranes, UV crosslinked at 120.000 µJ/cm<sup>2</sup> and probed with double digoxigenin (DIG)-labeled locked nucleic acid (LNA) detection probes (Qiagen, see supplementary table 5) at 55 °C over-night. The membranes were



subjected to stringent washes using SSC/SDS buffers. Subsequently, membranes were incubated with an anti-DIG-alkaline phosphatase (AP) solution (1:2500 diluted in blocking solution (Roche)) for 30 min at room temperature. Finally, northern blot signals were visualized using CDP star reagent (Roche) and the Vilber Fusion FX system according to manufacturer's instructions. The northern blot signals were normalized to the band intensity of the let-7a loading control.

#### *Bulk RNA-sequencing analysis using DESeq2*

Starting from count tables, RNA sequencing results were analysed on a per run basis comparing infected samples to time matched mock experiments unless otherwise specified using DESeq2<sup>107</sup> version 1.22.2. Genes with a maximum read count across samples of less than two were filtered out. Differentially expressed genes were defined as genes with an absolute fold change in mRNA abundance greater than 1.5 ( $\log_2$  fold change of 0.58 - using DESeq2 shrunken  $\log_2$  fold changes) and an adjusted p-value of less than 0.05 (Benjamini-Hochberg corrected).

#### *Gene ontology and KEGG enrichment analysis.*

Genes whose mRNAs were found to be differentially expressed were subjected to gene set overrepresentation analysis using the clusterProfiler package in R<sup>108</sup>.

#### *Single-cell RNA-seq*

Methanol-fixed cells were centrifuged at 2,000 x g for 5 min, rehydrated in 1 mL rehydration buffer containing 0.01% PBS/BSA and 1:100 Superasein (Thermo Fisher), and resuspended in 400  $\mu$ L rehydration buffer followed by passing through a 40  $\mu$ m cell strainer. Encapsulation was done with the Nadia system (Dolomite biosystems) using the built-in standard procedure. For library preparation, we followed the version 1.8 of the manufacturer's protocol, which is based on the protocol established by<sup>109</sup>, with adding a second-strand synthesis step<sup>110</sup>.

For the encapsulation, 75,000 cells in 250  $\mu$ L rehydration buffer were used, with 250  $\mu$ L of lysis buffer (6% Ficoll PM-400, 0.2% Sarkosyl, 20 mM EDTA, 200 mM Tris pH 7.5, 50 mM DTT) and 3 mL oil (Biorad #1864006). After encapsulation, beads were recovered from the emulsion by washing with 2 x 30 mL 6 x saline sodium citrate buffer (diluted from Sigma #S6639) buffer in a 5  $\mu$ m ÜberStrainer (pluriSelect). After another washing step in 1.5 mL 6 x SSC, cells were washed with 5 x reverse transcription buffer (250 mM Tris pH 8, 375 mM KCl, 15 mM MgCl<sub>2</sub>, 50 mM DTT) and resuspended in 200  $\mu$ L RT mix (50 mM Tris pH 8, 75 mM MgCl<sub>2</sub>, 3 mM MgCl<sub>2</sub>, 10 mM DTT, 4% Ficoll PM-400, 1 mM each dNTPs, 2.5  $\mu$ M Macosko TSO, 10  $\mu$ l Maxima H- RT enzyme). Beads were incubated for 30 min at room temperature and 90 min at 42 °C (all incubation steps on a rotator). After washing once with TE/0.5% SDS and twice with TE/0.01% Tween, beads were incubated in 200  $\mu$ L exonuclease

mix (10 $\mu$ l Exonuclease in 1x exonuclease buffer, NEB #M0293) for 45 min at 37 °C, again on a rotator. After washing with once with TE/0.5% SDS and twice TE/0.01% Tween, beads were incubated for 5 min in 0.1 M NaOH, washed with TE/0.01% Tween and TE, and incubated in 200  $\mu$ l second strand mix (50 mM Tris pH 8, 75 mM MgCl<sub>2</sub>, 3 mM MgCl<sub>2</sub>, 10 mM DTT, 12% PEG 8000, 1 mM each dNTPs, 10  $\mu$ M dN-SMRT oligo, 5  $\mu$ l Klenow enzyme NEB #M0212) for 1 h at 37 °C. Beads were again washed in TE/0.01% Tween and stored overnight in TE/0.01% Tween, then washed in TE and twice in water, and per sample eight PCR reactions with 4,000 beads each in 50 $\mu$ l using 1 $\mu$ M SMART PCR primer (oligos in supplementary table 5) and the 2x Kapa HiFi Hotstart Ready mix (Roche #07958935001) were performed, with pre-incubation for 3 minutes at 95 °C, then 4 cycles 98 °C/20s, 65°C/45s, 72 °C/3min, then 9 cycles 98 °C/20s, 67°C/20s, 72 °C/3min, then post-incubation for 3 minutes at 72 °C. The eight PCR reactions were pooled in three clean-up reactions using Ampure XP beads. For each of the three sub-samples, a Nextera XT v2 (Illumina) reaction was performed with 600 pg DNA. In a 20 $\mu$ l reaction, 10  $\mu$ l tagment DNA buffer and 5  $\mu$ l amplicon tagment mix were incubated for 5 minutes at 55 °C, and, after addition of 5  $\mu$ l neutralization buffer for 5 minutes at room temperature. Afterwards, 15  $\mu$ l PCR master mix were added, 200 nM New-P5-SMART PCR hybrid oligo, 200 nM index oligo in total 50  $\mu$ l. The Nextera reactions were then again pooled, purified using Ampure XP beads, and sequenced on a NovaSeq 6000 device with 21+71 cycles using Read1CustomSeqB for read 1.

#### *Single-cell data analysis*

After trimming one nucleotide from the 3' end of read one, count tables were generated using the PiGx-scrRNA-seq pipeline <sup>111</sup> version 1.1.4. In short, cells are separated from empty barcodes using the inflection method as implemented in the dropbead package <sup>112</sup>. The reads are then mapped to the combined human and viral genome using the STAR aligner <sup>101</sup>, with the default parameters. The resulting spliced and unspliced digital expression matrices are converted into loom, Seurat and SingleCellExperiment formats. For read mapping to the viral genomes, we used for SARS-CoV, the Frankfurt strain genome (accession number AY310120) and for SARS-CoV-2 the original Wuhan sequence (accession number MN908947.3). For both viruses, a feature labelled "UTR3" was added between the last annotated gene and the 3'-end, which captured most of the reads. Since the genes were counted separately, the scrRNA-seq data contains counts for all genes in the annotation. Preprocessing was done in R (version 3.6), using the Seurat package <sup>84</sup>. Cells with less than 2000 unspliced reads were filtered out of the analysis. Raw reads were then normalized, and scaled. Variable genes were defined using the variance

stabilizing method. Dimensionality reduction was performed using diffusion maps, as implemented in the destiny Bioconductor <sup>64</sup> package.

Diffusion components were used as the basis for UMAP embeddings <sup>113</sup>. Pseudotime inference was performed using the diffusion pseudotime trajectory <sup>65</sup>. A secondary UMAP embedding was constructed by using, as input, the diffusion pseudotime calculated probabilities of cell-cell transitions. The UMAP was embedded using the python package umap-learn. All processing was done using the default parameters. The processing was done separately both with and without including SARS-CoV and SARS-CoV-2 viral genes. Viral load was calculated as the sum of detected viral reads in each cell. Velocity estimation was performed using the R implementation of the original Velocityto method <sup>62</sup>. The following parameters were used for the projection of the vector field:  $n = 200$ ,  $scale = 'sqrt'$ ,  $arrow.scale = 3$ ,  $min.grid.cell.mass = 0.5$ .

To increase the power of detecting dynamic changes in gene expression (Fig. 5E), pseudotime based embedding was dynamically discretized using the Louvain algorithm. The input to the Louvain algorithm are eigenvectors of the diffusion matrix. The resulting bins were ordered based on the median SARS-CoV-2 expression, and the percentage of cells expressing genes of interest was visualized in each of the bins. The ordering of bins based on the median SARS-CoV-2 load corresponded almost exactly to the velocityto inferred trajectories.

Both Calu3 and H1299 cells were analyzed using the same parameters. To detect changes happening early in infection, Calu3 4h cells were additionally separately analyzed.

Preprocessing and analysis/figure scripts are available at github ([https://github.com/BIMSBbioinfo/Ewyler\\_SARS-CoV](https://github.com/BIMSBbioinfo/Ewyler_SARS-CoV)).

The analysis was visualized using ggplot2 <sup>114</sup>, ggrepel <sup>115</sup>, and the interactive exploration was enabled by iSEE <sup>116</sup>.

#### *HSP90 inhibitor experiments*

The HSP90 inhibitors were purchased either from Sigma (17-AAG, A8476) or from Selleckchem (Onalespib, S1163 and Ganetespib, S1159), and dissolved in DMSO. Cells were seeded and grown to subconfluence and infected with SARS-CoV-2 MOI 0.01 (Calu-3) or MOI 0.5 (AECs) diluted in OptiPro serum free medium. After 1 h virus adsorption the supernatant was removed and cells were washed twice with PBS. DMEM containing dilutions of 17-AAG (200 nM, 400 nM, 800 nM, 2,000 nM) or DMSO as solving control. Samples for detection of viral RNA and infectious particles in the supernatant as well as total RNA within the cells were taken 8, 16 and 24 hpi.

The cytotoxicity of the the HSP90 inhibitor was assured by cell viability assay using CellTiter-Glo® Luminescent Cell Viability Assay according to manufacturer's instruction (Promega). The activity of untreated cells was set as 100% and cells were treated with different concentrations of 17-AAG. The viability of cells was measured 16 and 24 h after treatment using Mithras Luminescence microplate reader (Berthold).

#### *Primary airway epithelial cells*

Cells isolated from distal lung tissue were cultured as described in Imai-Matsushima et al., 2018. Briefly, for expansion primary cells were co-cultivated with gamma-irradiated mitotically inactivated NIH3T3 mouse embryonic fibroblasts (MEFs) in a 3:1 mixture of Ham's F-12 nutrient mix (Life technologies) and DMEM supplemented with 5% FCS, 0.4µg/mL hydrocortisone (Sigma-Aldrich), 5µg/mL recombinant human insulin (Sigma-Aldrich), 8.4 ng/mL cholera toxin (Sigma-Aldrich), 24µg/mL Adenine (Sigma-Aldrich), and 10ng/mL recombinant human epidermal growth factor (Invitrogen), 0.1 µM DBZ (Tocris) and 9 µM Y27632 (Miltenyi Biotec)

Differentiation was induced by additional treatment with 3 µM CHIR-99021 (Sigma), 10 ng/ml KGF (Invitrogen), 10 ng/ml FGF-10 (Invitrogen), 100 µM IBMX (Sigma), 100 µM 8-Bromoadenosine 3',5'-cyclic monophosphate (Biolog), 25 nM Dexamethason (Sigma) and 20 µM DBZ for 3 days. Two days prior to infection the primary cells were separated from the MEFs by differential trypsinization and subsequently seeded in cell culture vessels in DMEM with 10% FCS, 1% non-essential amino acids, 1%, L-glutamine and 1% sodium pyruvate.

#### *RT-qPCR of viral RNA in the supernatant*

The viral RNA from supernatant of infected cells was isolated using the NucleoSpin RNA virus isolation kit (Macherey-Nagel) according to the manufacturer's instructions. To determine the amount of viral genome equivalents the previously published assay specific for both SARS-CoV and SARS-CoV-2 Envelope gene<sup>117</sup> was used. Data analysis was done using LightCycler Software 4.1 (Roche).
